# Supplementary material
Source: HighWire-hosted journal article supplement (https://erj.ersjournals.com/content/56/1/2000147)
Supplement: inline-supplementary-material-2 [file inline-supplementary-material-2.pdf]

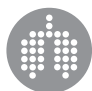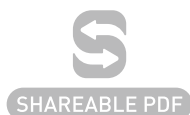

# Air pollution and the development of asthma from birth until young adulthood

Ulrike Gehring<sup>1</sup>, Alet H. Wijga<sup>2</sup>, Gerard H. Koppelman <sup>3,4</sup>, Judith M. Vonk <sup>4,5</sup>, Henriette A. Smit<sup>6</sup> and Bert Brunekreef<sup>1,6</sup>

**Affiliations:** <sup>1</sup>Institute for Risk Assessment Sciences, Utrecht University, Utrecht, The Netherlands. <sup>2</sup>Center for Nutrition, Prevention and Health Services, National Institute for Public Health and the Environment, Bilthoven, The Netherlands. <sup>3</sup>Dept of Pediatric Pulmonology, Beatrix Children's Hospital, University Medical Center Groningen, University of Groningen, Groningen, The Netherlands. <sup>4</sup>Groningen Research Institute for Asthma and COPD, University of Groningen, Groningen, The Netherlands. <sup>5</sup>Dept of Epidemiology, University Medical Center Groningen, University of Groningen, The Netherlands. <sup>6</sup>Julius Center for Health Sciences and Primary Care, University Medical Center Utrecht, Utrecht, The Netherlands.

**Correspondence:** Ulrike Gehring, Institute for Risk Assessment Sciences, Utrecht University, P.O. Box 80178, 3508 TD Utrecht, The Netherlands. E-mail: u.gehring@uu.nl

@ERSpublications

Early-life exposure to air pollution, especially from motorised traffic, may have long-term consequences for asthma development, as it is associated with an increased risk of developing asthma through childhood and adolescence into early adulthood <https://bit.ly/39uZHVH>

**Cite this article as:** Gehring U, Wijga AH, Koppelman GH, *et al.* Air pollution and the development of asthma from birth until young adulthood. *Eur Respir J* 2020; 56: 2000147 [<https://doi.org/10.1183/13993003.00147-2020>].

This single-page version can be shared freely online.

## ABSTRACT

**Background:** Air pollution is associated with asthma development in children and adults, but the impact on asthma development during the transition from adolescence to adulthood is unclear. Adult studies lack historical exposures and consequently cannot assess the relevance of exposure during different periods of life. We assessed the relevance of early-life and more recent air pollution exposure for asthma development from birth until early adulthood.

**Methods:** We used data of 3687 participants of the prospective Dutch PIAMA (Prevention and Incidence of Asthma and Mite Allergy) birth cohort and linked asthma incidence until age 20 years to estimated concentrations of nitrogen dioxide (NO<sub>2</sub>), particulate matter with a diameter <2.5 µm (PM<sub>2.5</sub>), <10 µm (PM<sub>10</sub>), and 2.5–10 µm, and PM<sub>2.5</sub> absorbance (“soot”) at the residential address. We assessed overall and age-specific associations with air pollution exposure with discrete time-hazard models, adjusting for potential confounders.

**Results:** Overall, we found higher incidence of asthma until the age of 20 years with higher exposure to all pollutants at the birth address (adjusted odds ratio (95% CI) ranging from 1.09 (1.01–1.18) for PM<sub>10</sub> to 1.20 (1.10–1.32) for NO<sub>2</sub>) per interquartile range increase) that were rather persistent with age. Similar associations were observed with more recent exposure defined as exposure at the current home address. In two-pollutant models with particulate matter, associations with NO<sub>2</sub> persisted.

**Conclusions:** Exposure to air pollution, especially from motorised traffic, early in life may have long-term consequences for asthma development, as it is associated with an increased risk of developing asthma through childhood and adolescence into early adulthood.
